# Supplementary material for: Antibacterial activity of synthetic pyrido[2,3-d]pyrimidines armed with nitrile groups: POM analysis and identification of pharmacophore sites of nitriles as important pro-drugs
Source: Royal Society of Chemistry journal article supplement (doi:10.1039/c8nj02081g), 2018-01-01

**Antibacterial activity of synthetic pyrido[2,3-d]pyrimidines armed with nitrile group: POM analyses and identification of pharmacophore sites of nitriles as important *pro*-drugs**

Rajendra Sukhdeorao Dongre,<sup>\*a</sup> Jyostna S. Meshram,<sup>a</sup> Rupali Sudhakarrrao Selokar,<sup>a</sup>  
Faisal A. Almalki,<sup>b</sup> Taibi Ben Hadda<sup>\*,c</sup>

**Supplementary/Spectroscopic Data of Synthesized compounds**

***7-Amino-5-(4-chlorophenyl)-1,3-dimethyl-2,4-dioxo-1,2,3,4-tetrahydropyrido[2,3-d]pyrimidine-6-carbonitrile (4e)***

White powder. Yield 92%. IR (KBr,  $\text{cm}^{-1}$ ): 3377 ( $-\text{NH}_2$ ), 2206 ( $-\text{CN}$ ), 1759 ( $-\text{C}=\text{O}$ ), 1618 ( $-\text{C}=\text{O}$ );  $^1\text{H}$  NMR (300 MHz,  $\text{DMSO}-d_6$ , ppm): 3.3 (s, 3H,  $\text{CH}_3$ ), 3.7 (s, 3H,  $\text{CH}_3$ ), 5.8 (s, 2H,  $\text{NH}_2$ ), 7.2 (s, 1H,  $\text{H}_{\text{Ar}}$ ), 7.4 (br s, 1H,  $\text{H}_{\text{Ar}}$ ), 7.5 (br s, 2H,  $\text{H}_{\text{Ar}}$ );  $^{13}\text{C}$  NMR (100 MHz,  $\text{DMSO}-d_6$ , ppm): 160, 146, 134, 132, 130, 126, 126, 114, 112, 111, 98, 87, 28, 27; EI-MS ( $m/z$ ) = 341 ( $\text{M}^+$ ).

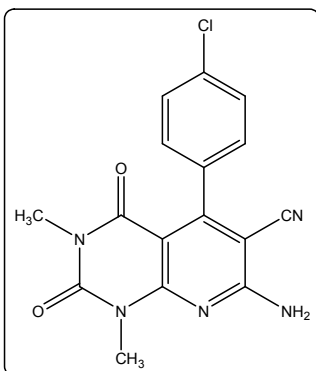

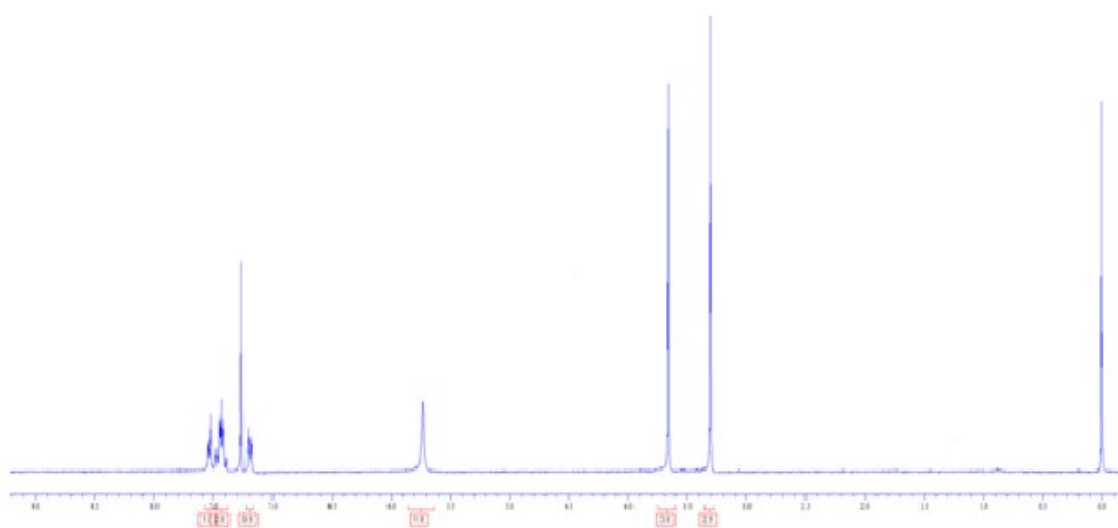

<sup>1</sup>H Spectrum of compound 4e

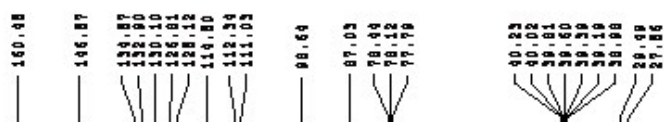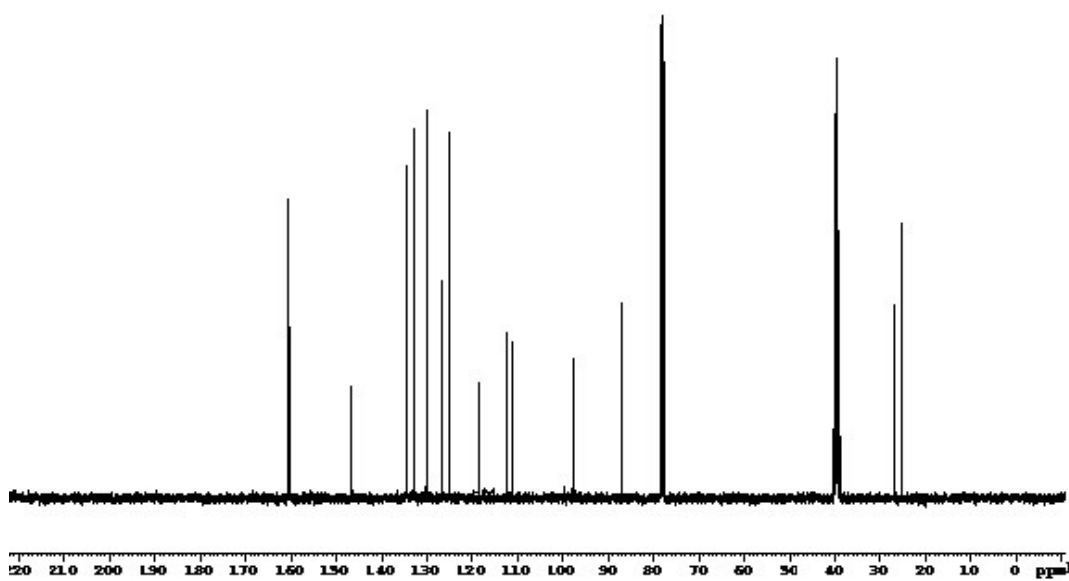

<sup>13</sup>C Spectrum of compound 4e

**7-Amino-5-(4-nitrophenyl)-1,3-dimethyl-2,4-dioxo-1,2,3,4-tetrahydropyrido[2,3-d]pyrimidine-6-carbonitrile (4f)**

White powder. Yield 95%. IR (KBr,  $\text{cm}^{-1}$ ): 3297 ( $-\text{NH}_2$ ), 2222 ( $-\text{CN}$ ), 1758 ( $-\text{C}=\text{O}$ ), 1624 ( $-\text{C}=\text{O}$ );  $^1\text{H}$  NMR (300 MHz,  $\text{DMSO-d}_6$ , ppm): 3.3 (s, 3H,  $\text{CH}_3$ ), 3.7 (s, 3H,  $\text{CH}_3$ ), 7.4 (s, 2H,  $\text{NH}_2$ ), 7.9 (d, 2H,  $\text{H}_{\text{Ar}}$ ), 8.1 (d, 2H,  $\text{H}_{\text{Ar}}$ ) ppm;  $^{13}\text{C}$  NMR (100 MHz,  $\text{DMSO-d}_6$ , ppm): 160, 158, 156, 150, 133, 124, 115, 114, 113, 98, 88, 29, 27; EI-MS ( $m/z$ ) = 353 ( $\text{M}^+$ ).

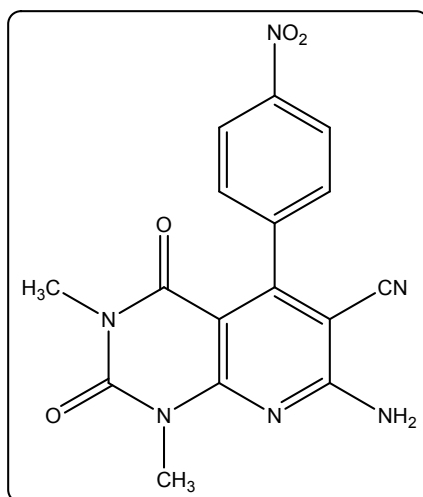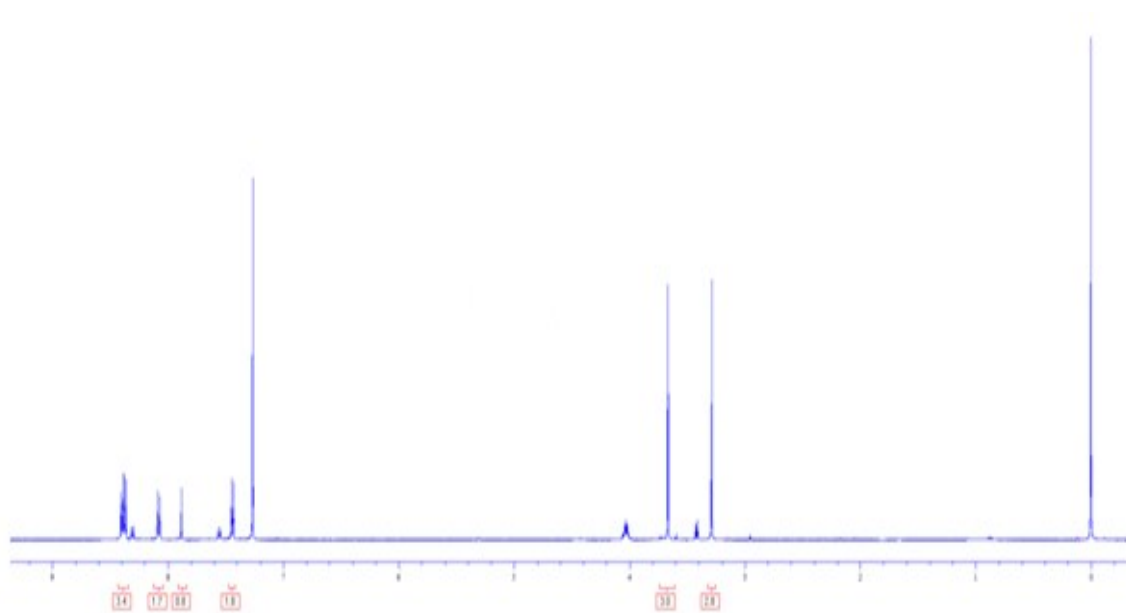

$^1\text{H}$  Spectrum of compound 4f

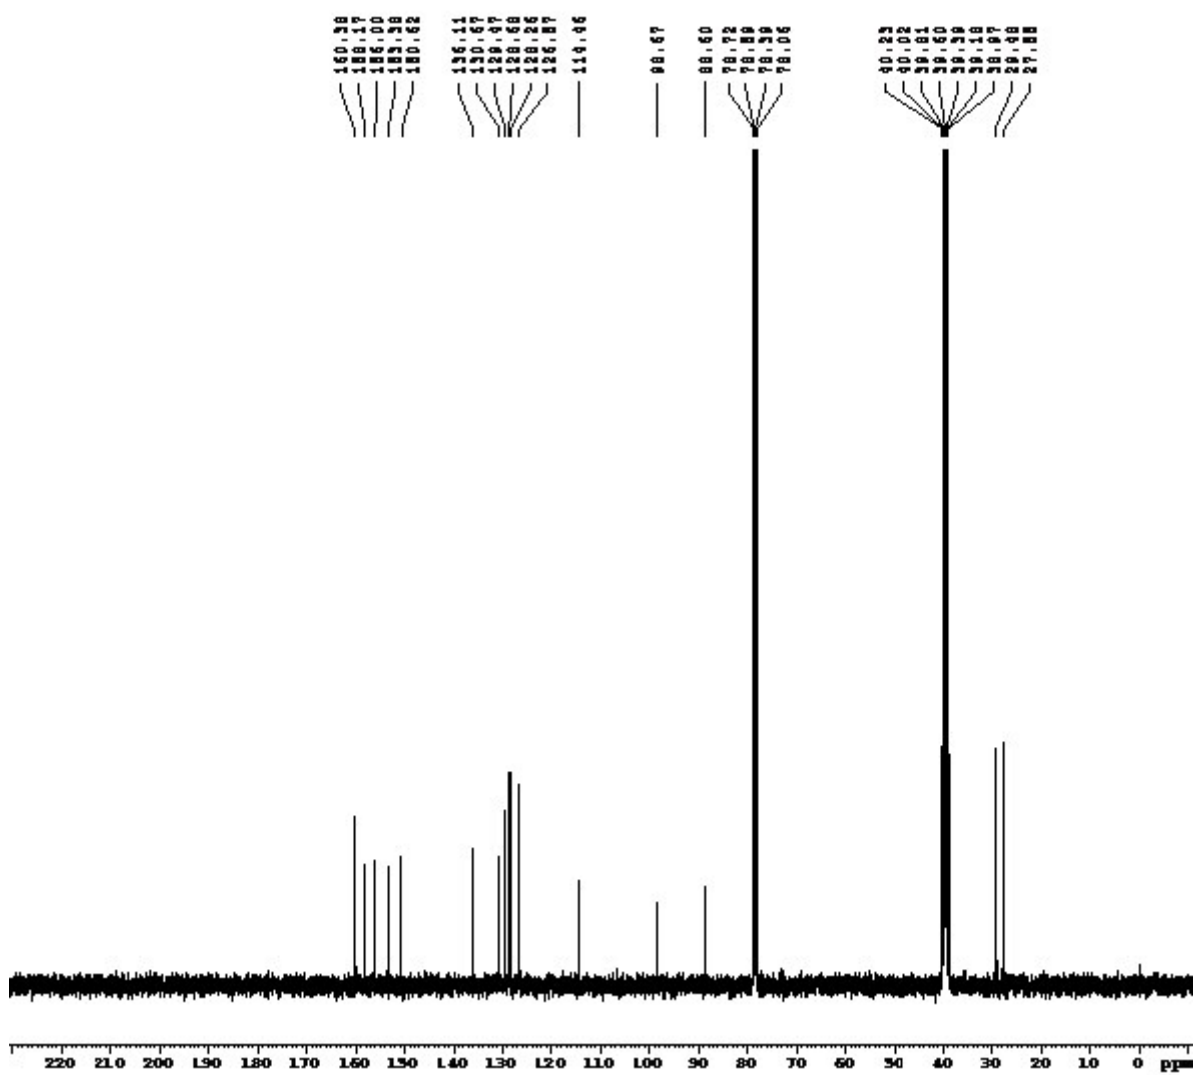

<sup>13</sup>C Spectrum of compound 4h

**7-Amino-5-(2-nitrophenyl)-1,3-dimethyl-2,4-dioxo-1,2,3,4-tetrahydropyrido[2,3-d]pyrimidine-6-carbonitrile (4h)**

Yellow powder. Yield 89%. IR (KBr,  $\text{cm}^{-1}$ ): 3403 ( $-\text{NH}_2$ ), 2225 ( $-\text{CN}$ ), 1707 ( $-\text{C}=\text{O}$ ), 1613 ( $-\text{C}=\text{O}$ );  $^1\text{H}$  NMR (300 MHz,  $\text{DMSO-d}_6$ , ppm): 1.6 (s, 3H,  $\text{CH}_3$ ), 3.5 (s, 3H,  $\text{CH}_3$ ), 7.5 (br-s, 2H,  $\text{NH}_2$ ), 7.6 (d, 1H,  $\text{H}_{\text{Ar}}$ ), 7.7 (dt, 1H,  $\text{H}_{\text{Ar}}$ ), 7.7-9 (t, 1H,  $\text{H}_{\text{Ar}}$ );  $^{13}\text{C}$  NMR (100 MHz,  $\text{DMSO-d}_6$ , ppm), 164, 158, 156, 155, 150, 133, 124, 115, 114, 113, 98, 88, 55, 29, 27; EI-MS ( $m/z$ ) = 353 ( $\text{M}^+$ ).

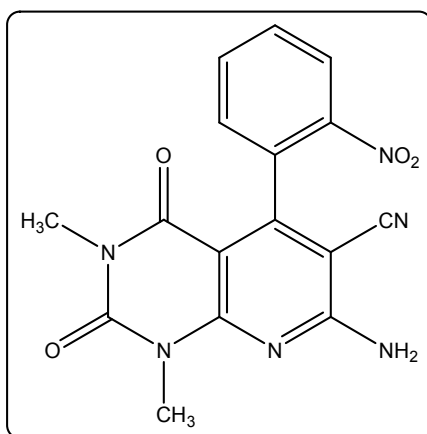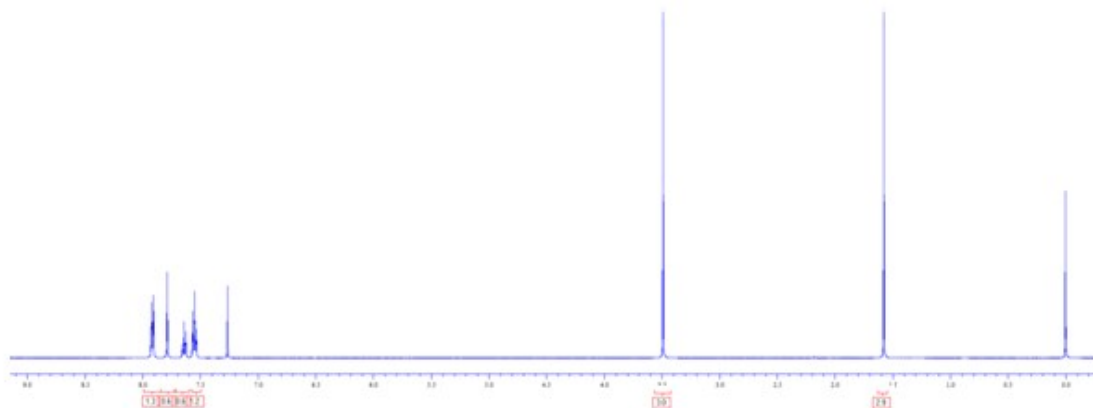

$^1\text{H}$  Spectrum of compound 4h

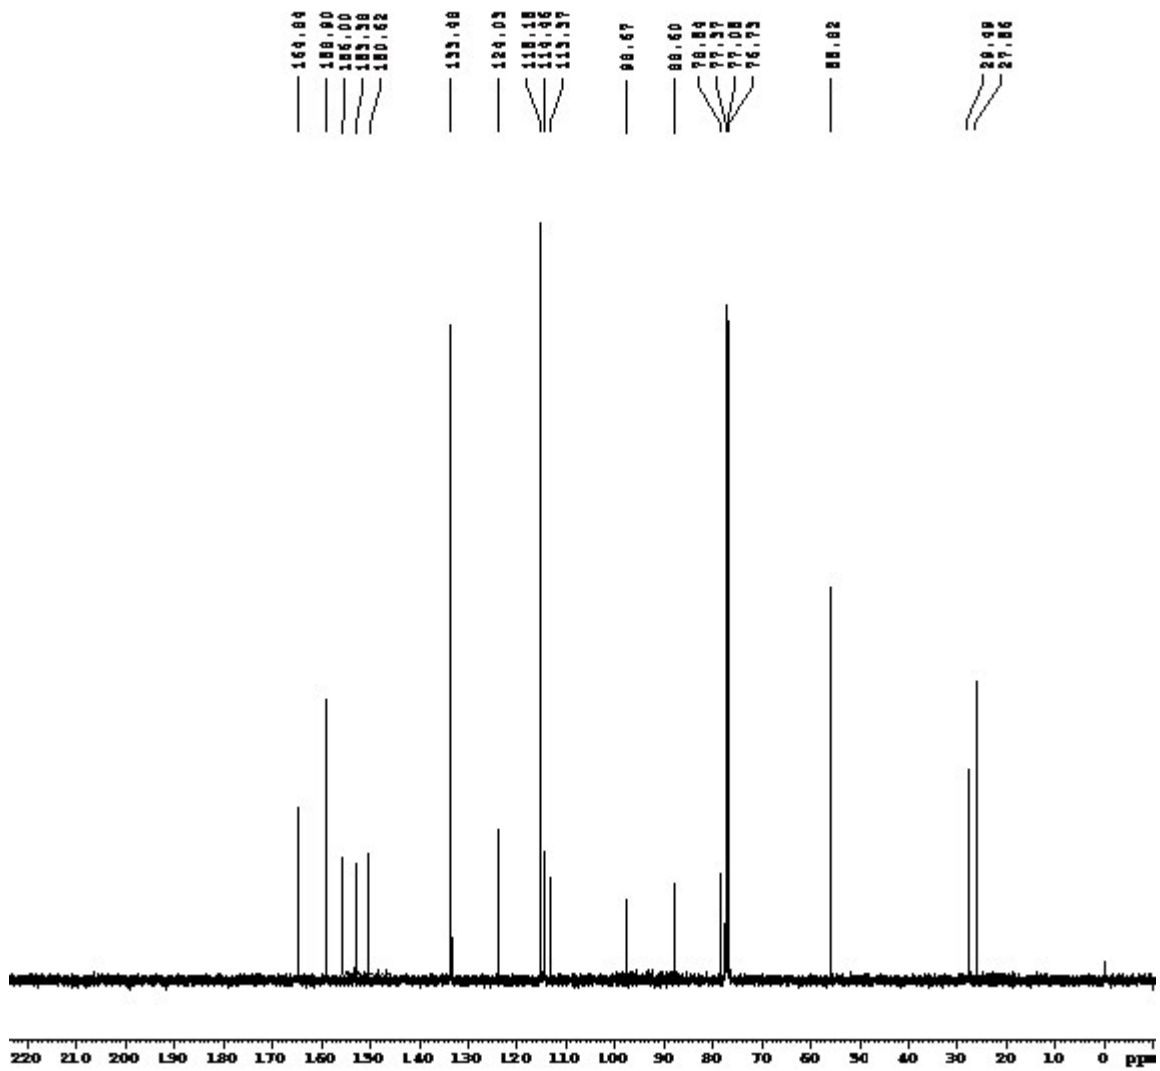

$^{13}\text{C}$  Spectrum of compound 4h

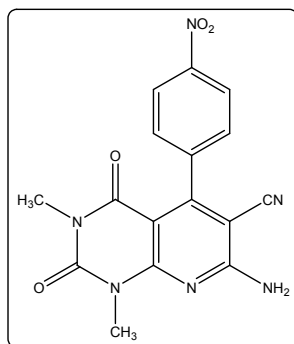

**7-amino-5-(4-nitrophenyl)-1,3-dimethyl-2,4-dioxo-1,2,3,4-tetrahydropyrido [2,3-d] pyrimidine-6-carbonitrile compound 4g.**

**IR spectrum of compound 4g.**

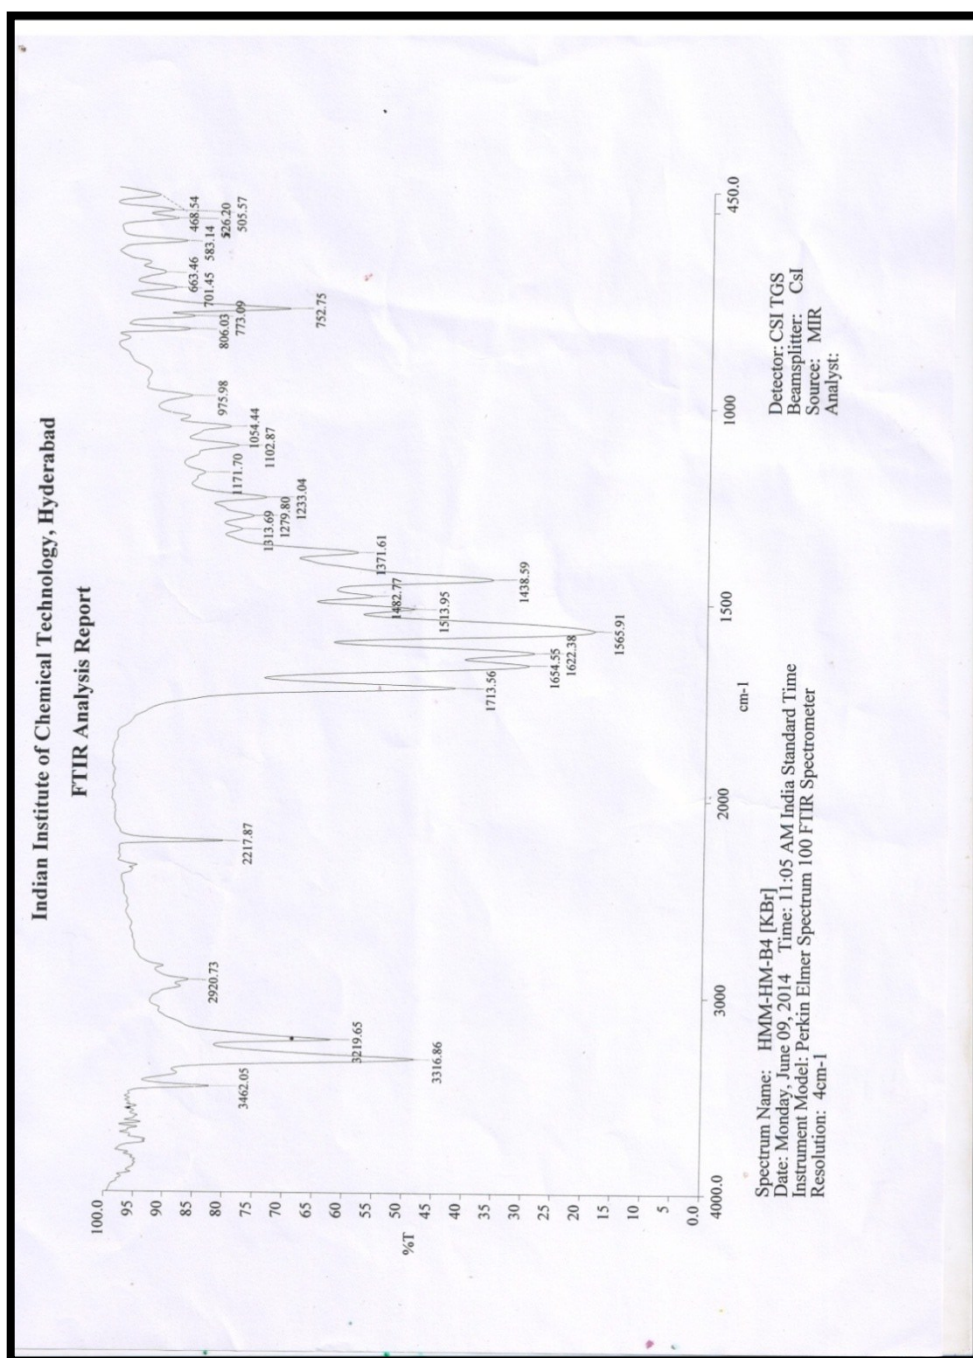

**$H^1$ -NMR spectrum of compound 4g.**



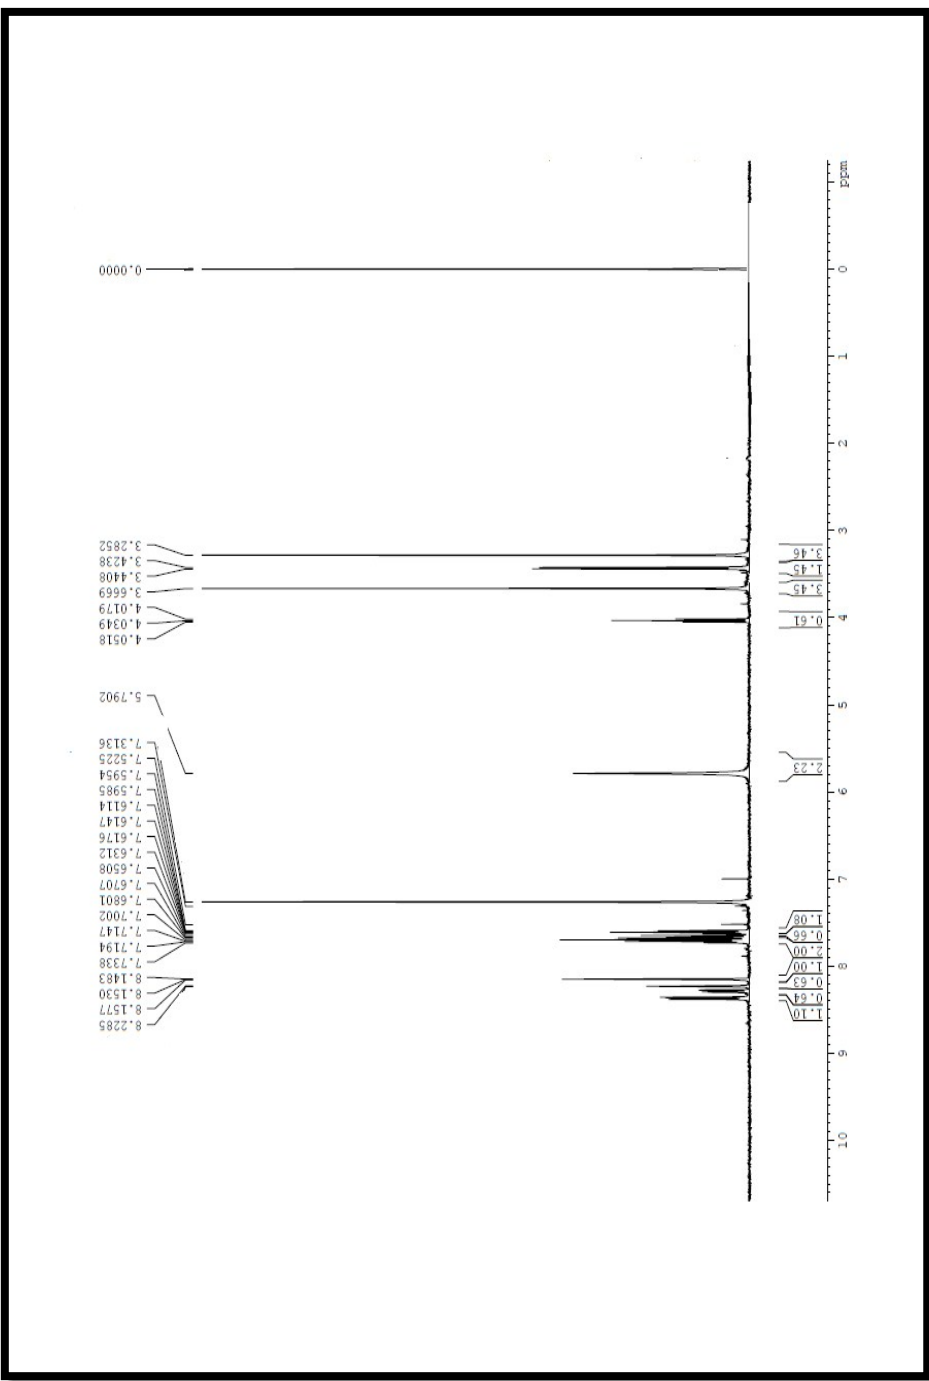

**<sup>13</sup>C-NMR spectrum of compound 4g.**

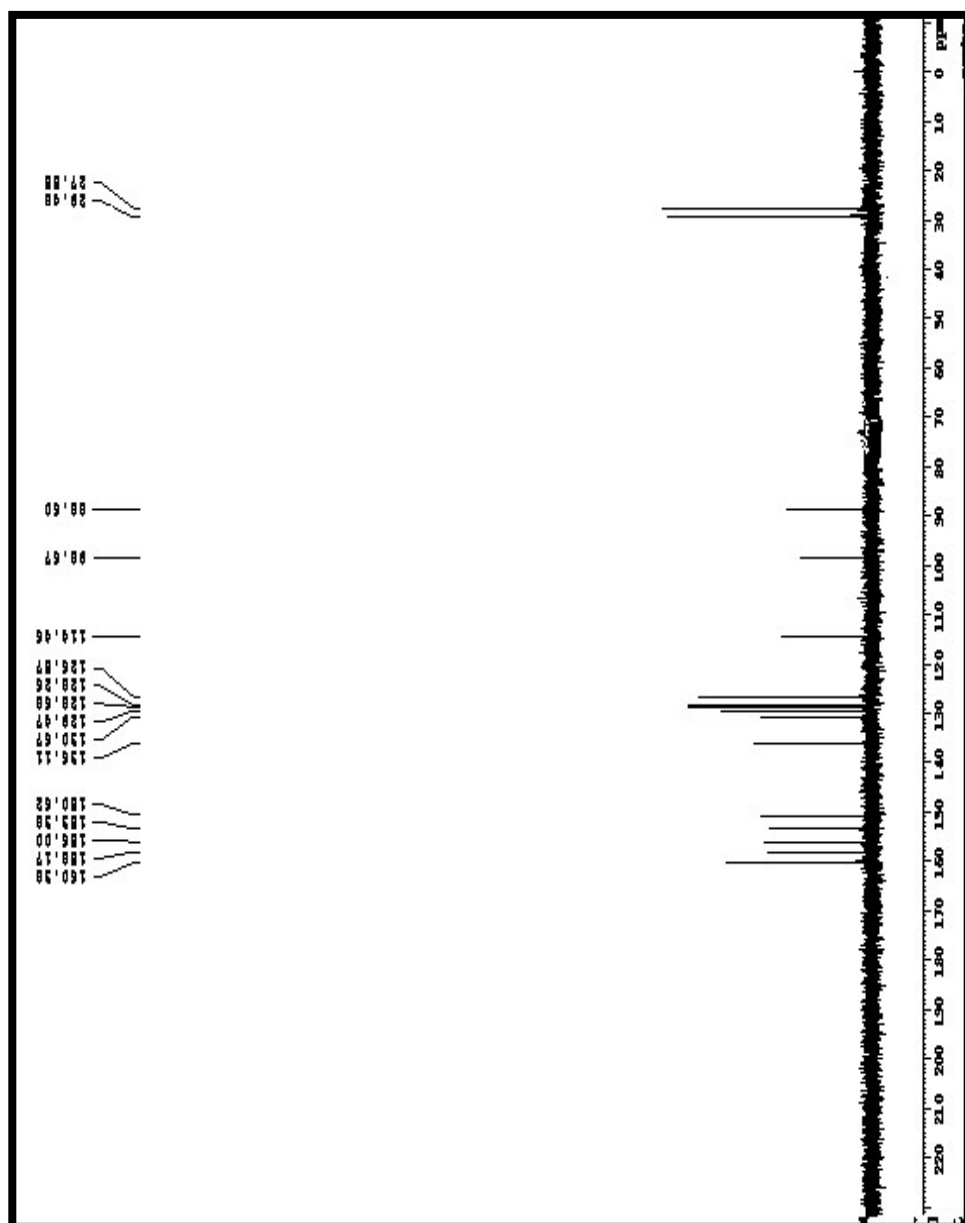

LC-MS spectrum of compound 4g.

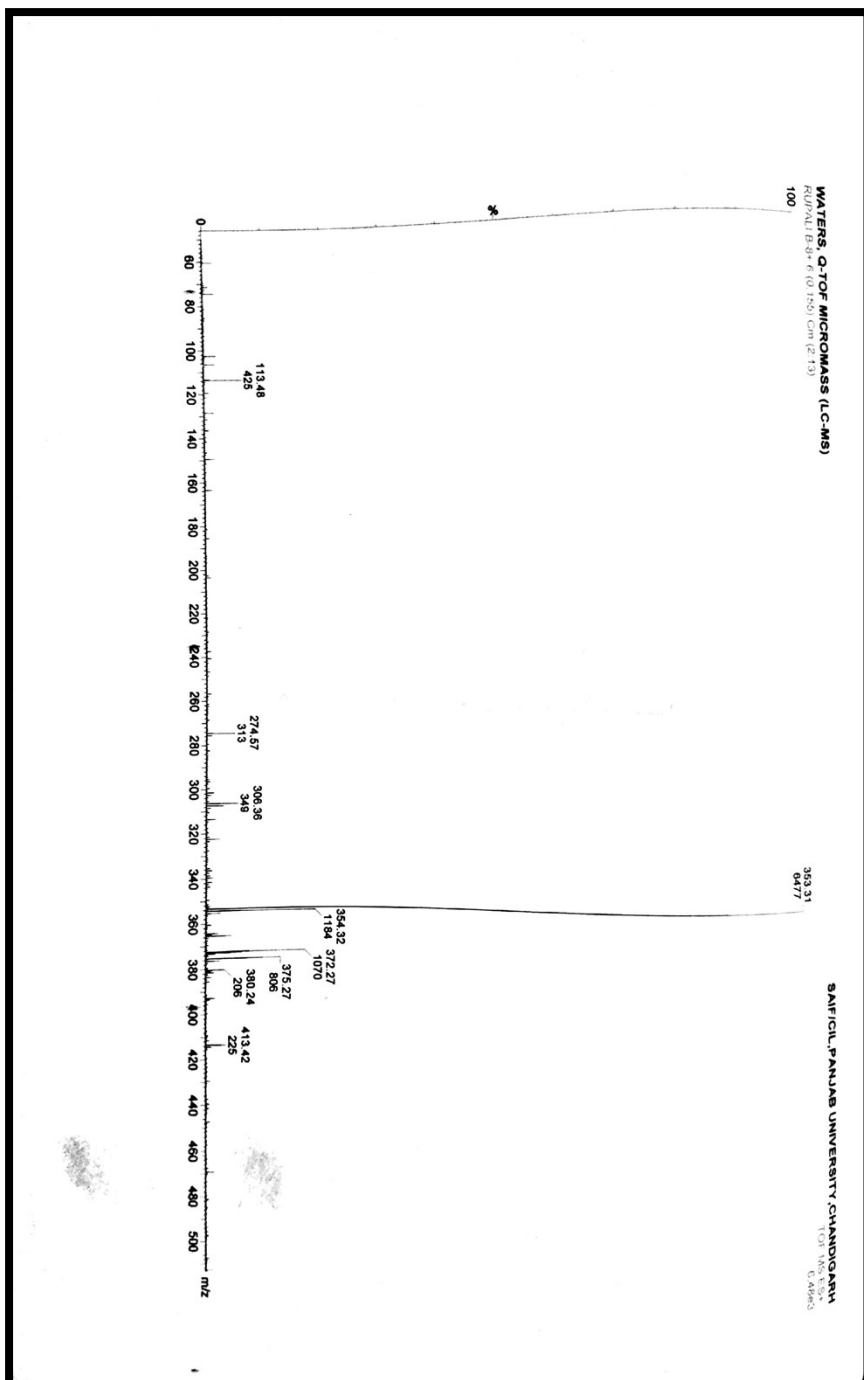

Supplement: c8nj02081g1.pdf [file c8nj02081g1.pdf]
